# Supplementary material for: NACA and LRP6 Are Part of a Common Genetic Pathway Necessary for Full Anabolic Response to Intermittent PTH
Source: MDPI journal article supplement (doi:10.3390/ijms23020940), 2022-01-15
Supplement: s1 [file s1]

## SUPPLEMENTARY FIGURES

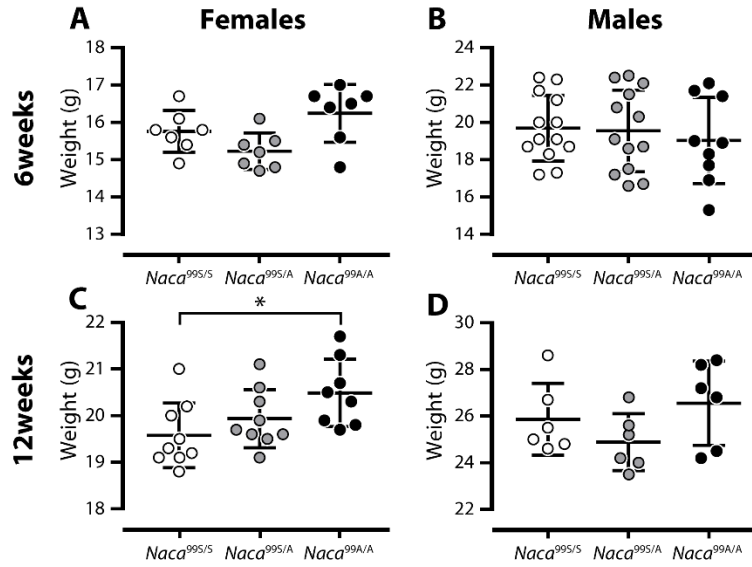

**Supplementary Figure S1.** Weight gain in *Naca*<sup>99S/A</sup> knock-in strain. Littermates of all genotypes and both sexes were weighted at 6 and 12 weeks of age. \*, p<0.05, one-way analysis of variance (ANOVA) with post-hoc test.

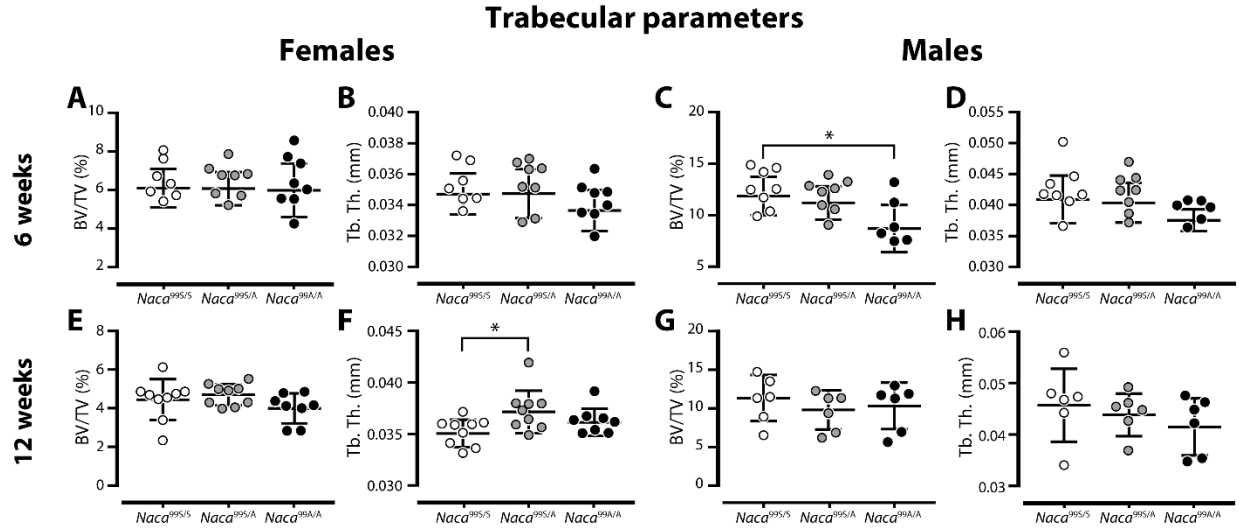

**Supplementary Figure S2.** Steady-state vertebral trabecular parameters in *Naca*<sup>99S/A</sup> knock-in strain. Vertebrae from littermates of all genotypes and both sexes were analyzed by mCT at 6 and 12 weeks of age. BV/TV, bone volume/tissue volume; Tb. Th., trabecular thickness. \*,  $p < 0.05$ , one-way analysis of variance (ANOVA) with post-hoc test.

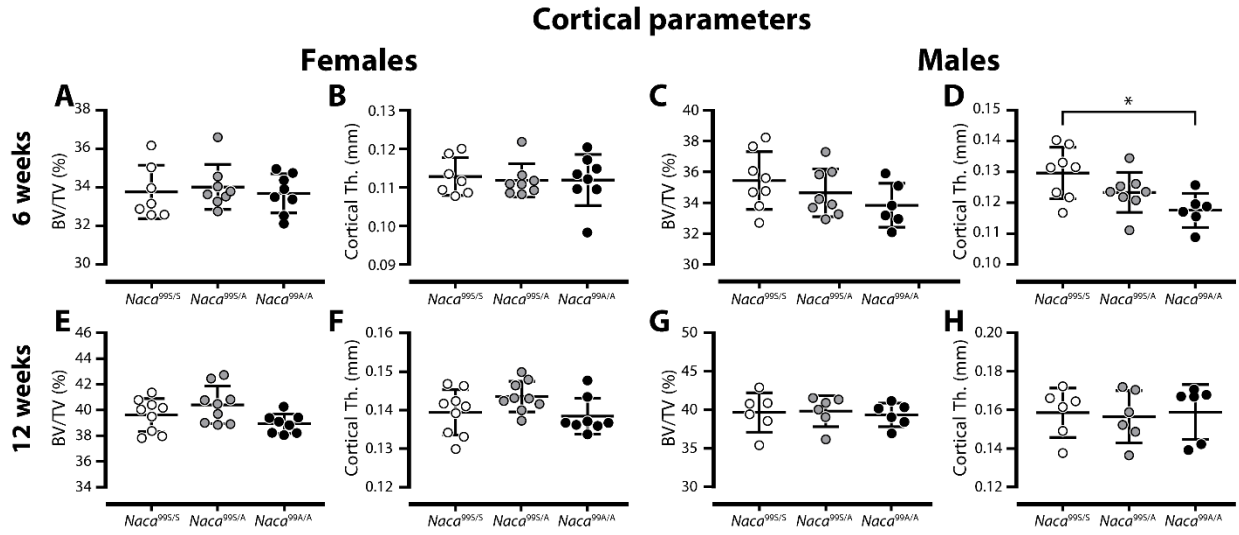

**Supplementary Figure S3.** Steady-state vertebral cortical parameters in  $Naca^{99S/A}$  knock-in strain. Vertebrae from littermates of all genotypes and both sexes were analyzed by mCT at 6 and 12 weeks of age. BV/TV, bone volume/tissue volume; Cortical. Th., cortical thickness. \*,  $p < 0.05$ , one-way analysis of variance (ANOVA) with post-hoc test.

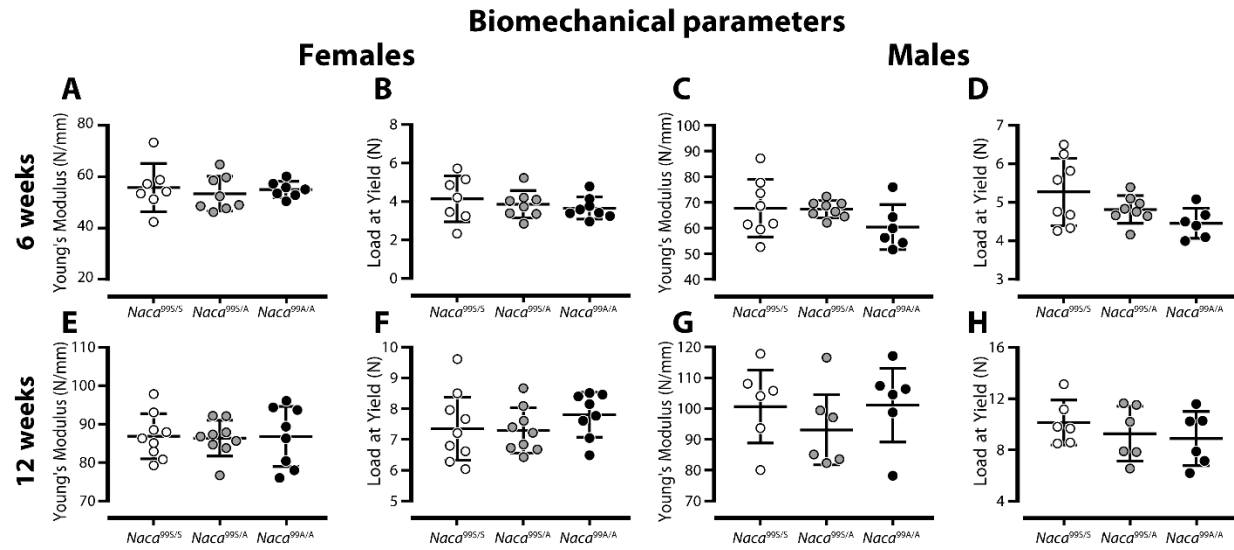

**Supplementary Figure S4.** Steady-state vertebral biomechanical parameters in *Naca*<sup>99S/A</sup> knock-in strain. Vertebrae from littermates of all genotypes and both sexes were analyzed by compression testing at 6 and 12 weeks of age.

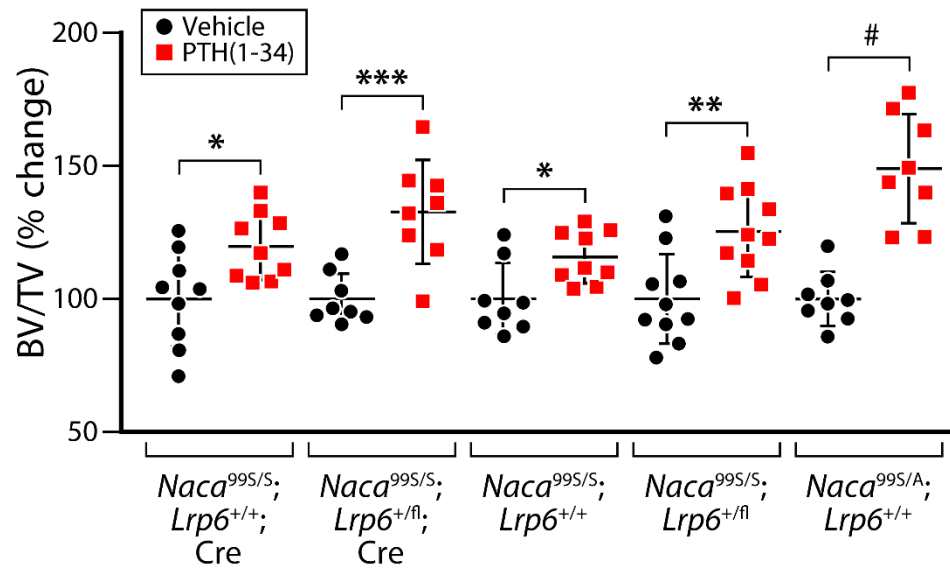

**Supplementary Figure S5.** Osteoanabolic response to iPTH in control genotypes. Four months-old female littermates of the indicated control genotypes were treated once daily, five days/week for one month with 100 mg/kg of PTH(1-34). Vertebrae were analyzed by mCT. BV/TV, bone volume/tissue volume. Results are expressed as % change from vehicle-treated animals. \*,  $p < 0.05$ ; \*\*,  $p < 0.01$ ; \*\*\*,  $p < 0.001$ ; #,  $p < 0.0001$ , two-way ANOVA with post-hoc tests.
